# Supplementary material
Source: PubMed Central journal article supplement (PMC3266798)
Supplement: JCI61034sd.pdf [file JCI61034sd.pdf]

## SUPPLEMENTAL MATERIAL

### **Imiquimod clears tumors in mice independent of adaptive immunity by converting pDCs into tumor-killing effector cells**

Barbara Drobits, Martin Holcman, Nicole Amberg, Melissa Swiecki, Roland Grundtner, Martina Hammer, Marco Colonna, Maria Sibilio

**Supplemental Figure 1** shows TLR expression and cytokine induction of Imiquimod treated skin as well as gating strategies to identify pDCs in the skin.

**Supplemental Figure 2** demonstrates the bone marrow chimerism by molecular analysis (PCR) and shows tumor growth in *Myd88*<sup>-/-</sup> chimeric mice

**Supplemental Figure 3** confirms the efficient and specific depletion of the respective immune cell population in tumor-bearing mice. It also shows that pDCs upregulate CD8 $\alpha$  after Imiquimod treatment.

**Supplemental Figure 4** shows that pDC were specifically depleted in tumor-bearing *Bdca2*-DTR mice after DT treatment. Moreover, it shows the apoptosis observed in Imiquimod treated tumor tissue.

**Supplemental Figure 5** confirms cell purity after FACS sorting and shows that Imiquimod-activated pDCs upregulate cytotoxic molecules in a TLR7- and IFNAR1-dependent manner.

**Supplemental Table 1** shows primer sequences for RT- and qRT-PCRs.

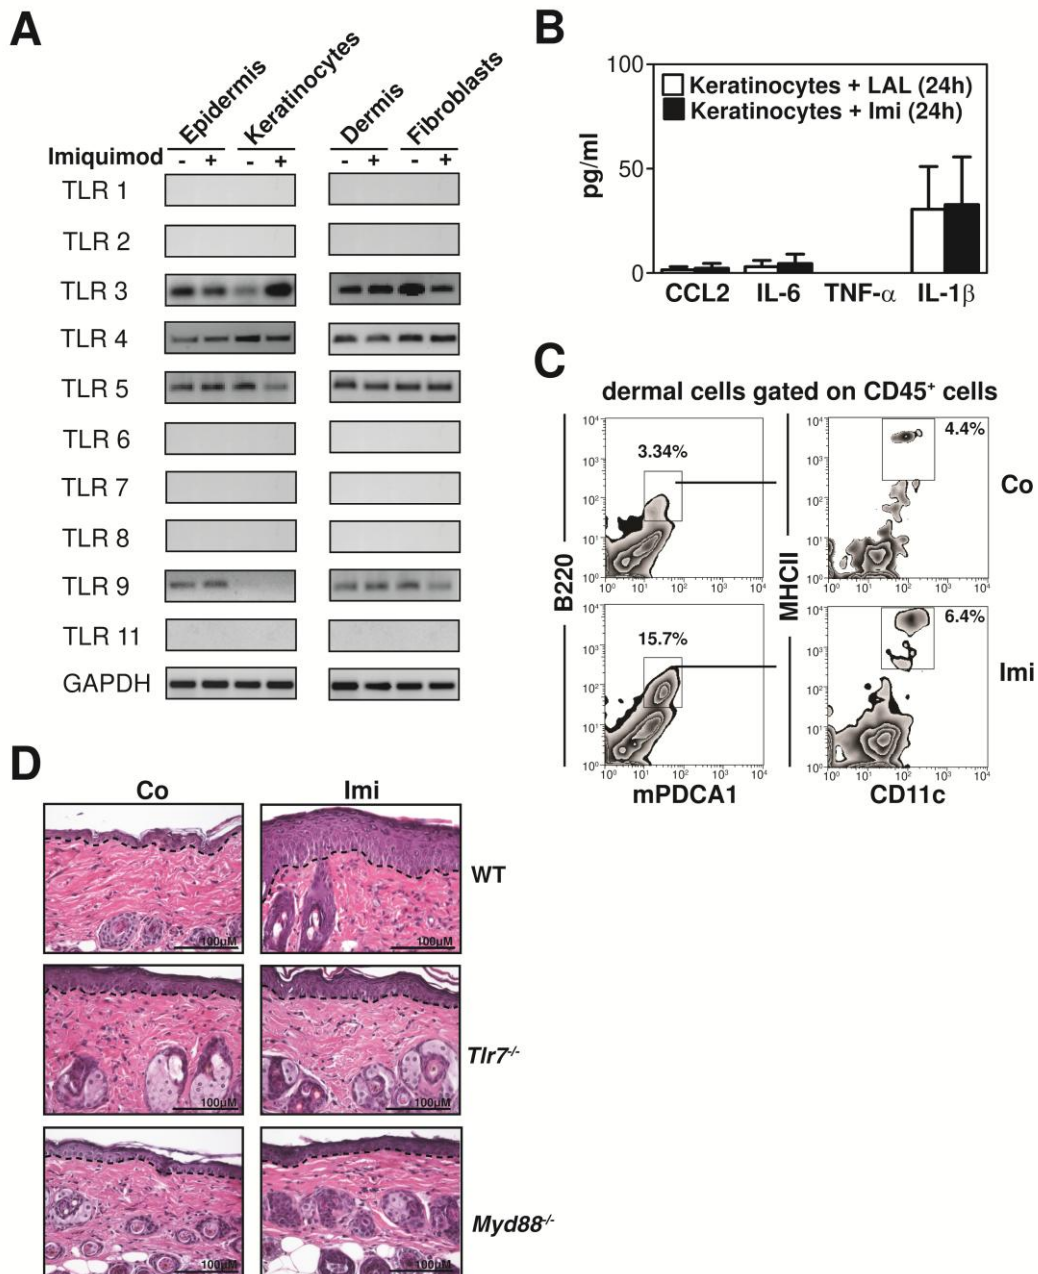

### Supplemental Figure 1 Effects of Imiquimod in the skin

**(A)** RT-PCR analysis showing TLR1-9, 11 expression in the indicated cells and tissues of mice treated for 7 days with Imiquimod (Imi) or left untreated. Results are representative of at least three independent experiments. **(B)** Primary keratinocyte cultures isolated from C57BL/6 (WT) mice were stimulated with Imi (12  $\mu$ g/ml) or LAL reagent water (control) for 24 hours and cytokines such as IL-6, TNF- $\alpha$ , IL-1 $\beta$  or CCL2 were measured in the supernatants. **(C)** FACS analysis showing representative dot plots of pDCs infiltrating the dermis of WT mice 3 days after Imi treatment. CD45<sup>+</sup> cells within the dermal cell suspension were further gated for mPDCA1<sup>+</sup>B220<sup>+</sup> and CD11c<sup>+</sup>MHCII<sup>+</sup>. Data are representative for at least 2 independent samples. **(D)** H&E staining of skin sections from mice of the indicated genotype. Skin was treated with Imi for 7 days or left untreated (Co). Magnification x400. The dotted lines delineate the dermal-epidermal junction. Data are representative for at least 3 independent samples.

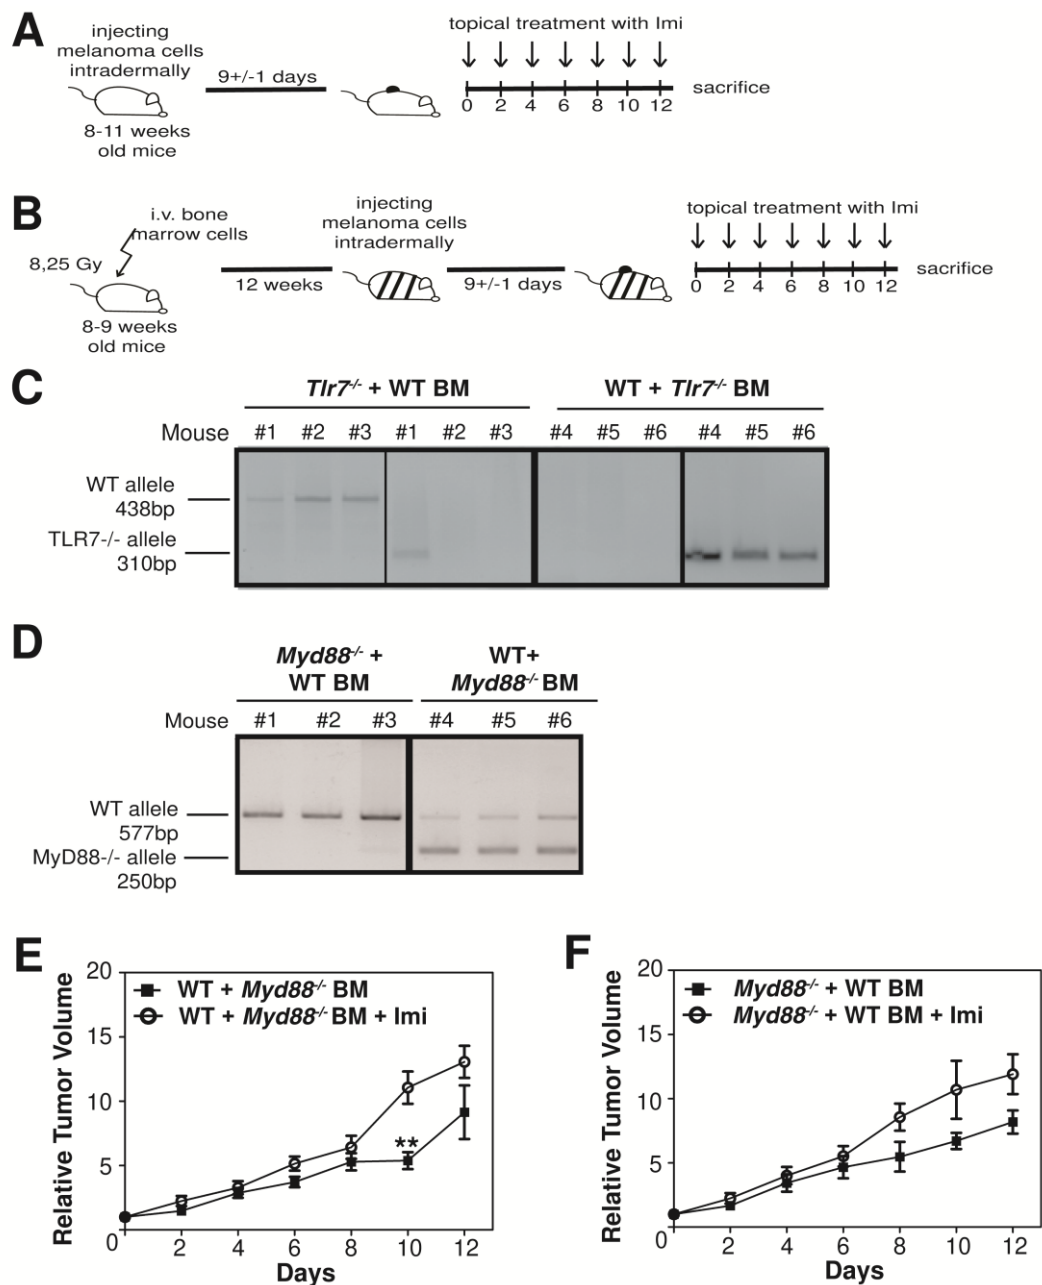

**Supplemental Figure 2 Tumor induction and generation of bone marrow chimeras**

**(A)** Mice were injected intradermally with B16-F10 melanoma cells. Mice developed tumors after 9 days which were treated topically with Imi every other day. **(B)** Experimental scheme for tumor induction in bone marrow (BM) chimeras: 8-9 weeks old mice were lethally irradiated and reconstituted intravenously with BM cells. Tumor cells were intradermally injected 12 weeks later and the same experimental protocol as depicted in A was followed. **(C and D)** BM chimerism was verified by PCR with primers detecting the respective wild-type (WT) and knock out alleles in BM cells isolated from mice reconstituted with either WT, *Tlr7*<sup>-/-</sup> or *Myd88*<sup>-/-</sup> BM. Results are representative for at least 2 independent batches. **(E and F)** Relative tumor volume in BM chimeras of the indicated genotypes following Imi treatment. WT and *Myd88*<sup>-/-</sup> mice were lethally irradiated and reconstituted intravenously with BM cells of the indicated genotypes. After 12 weeks reconstituted mice were injected intradermally with B16-F10 melanoma cells and tumors treated with Imi or left untreated (n = 7-11 per group). Data represent mean  $\pm$  SEM of at least 2 independent experiments. \*  $P < 0.05$ , \*\*  $P < 0.005$

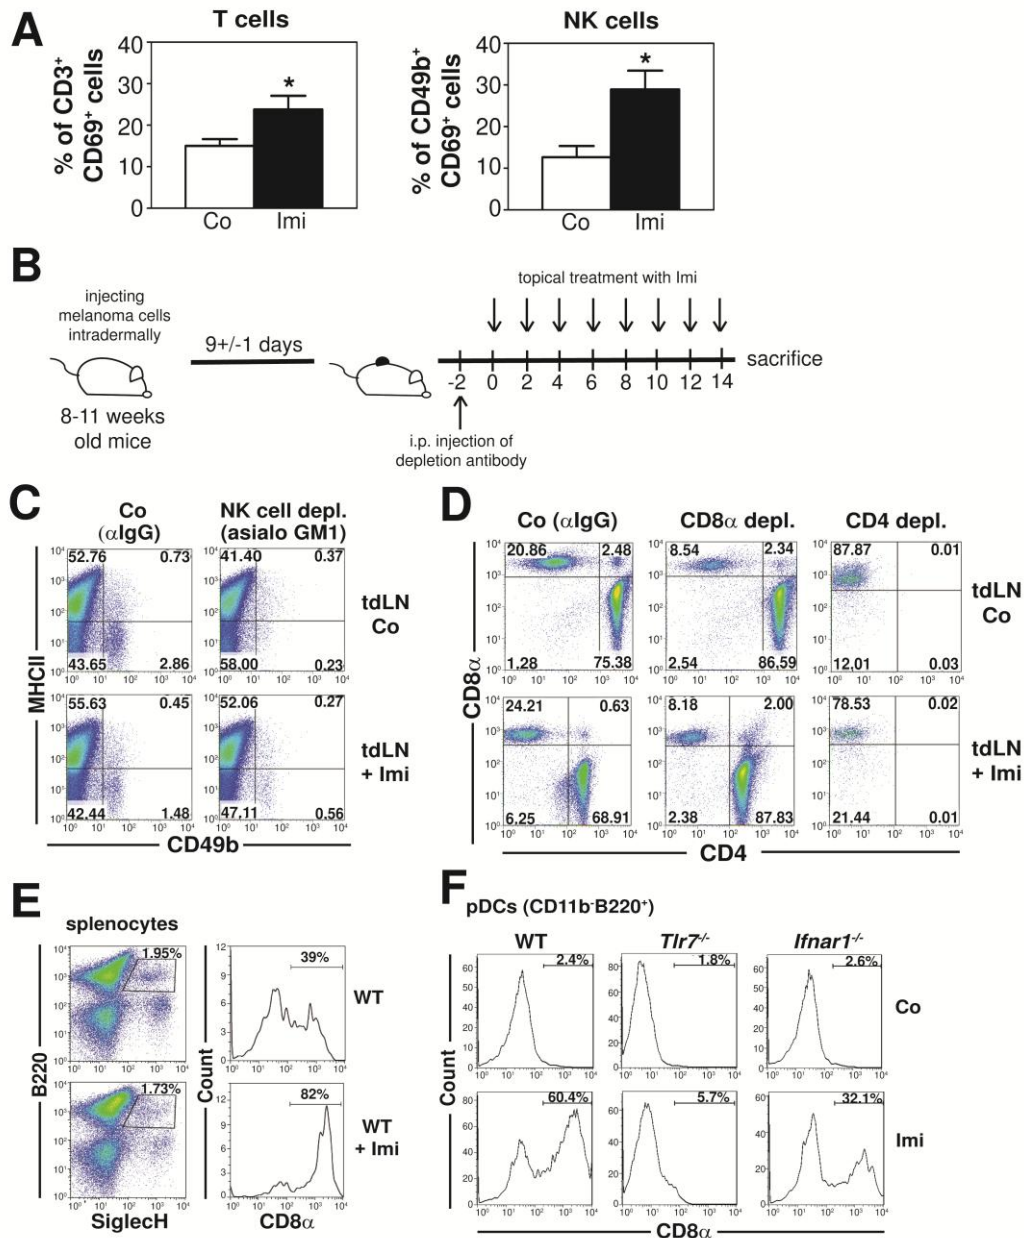

### Supplemental Figure 3 Analysis of immune cells in mice depleted of specific immune cell populations

**(A)** Increased activation of tumor infiltrating T cells (CD3) and NK cells (CD49b) shown by upregulation of CD69 on the respective cells in Imi treated tumors **(B)** Experimental protocol for cell depletion experiments. Tumor bearing mice were injected with antibodies depleting the indicated cell population before starting the topical treatment with Imi. **(C and D)** FACS analysis showing depletion efficacy in tumor draining lymph nodes (tdLN) of mice treated with specific anti-NK cell antibodies **(C)**, anti-CD4 antibodies or anti-CD8 $\alpha$  antibodies **(D)**. **(E and F)** FACS analysis for CD8 $\alpha$  expression on pDCs (Siglech<sup>+</sup>B220<sup>+</sup>) in cultured splenocytes **(E)** and BM-derived pDCs (CD11b<sup>+</sup>B220<sup>+</sup>) of WT, *Tlr7*<sup>-/-</sup> or *Ifnar1*<sup>-/-</sup> mice **(F)** stimulated with Imi (2.5  $\mu$ g/ml) for 24 hours. Results are representative for at least 2 independent batches. \*  $P < 0.05$

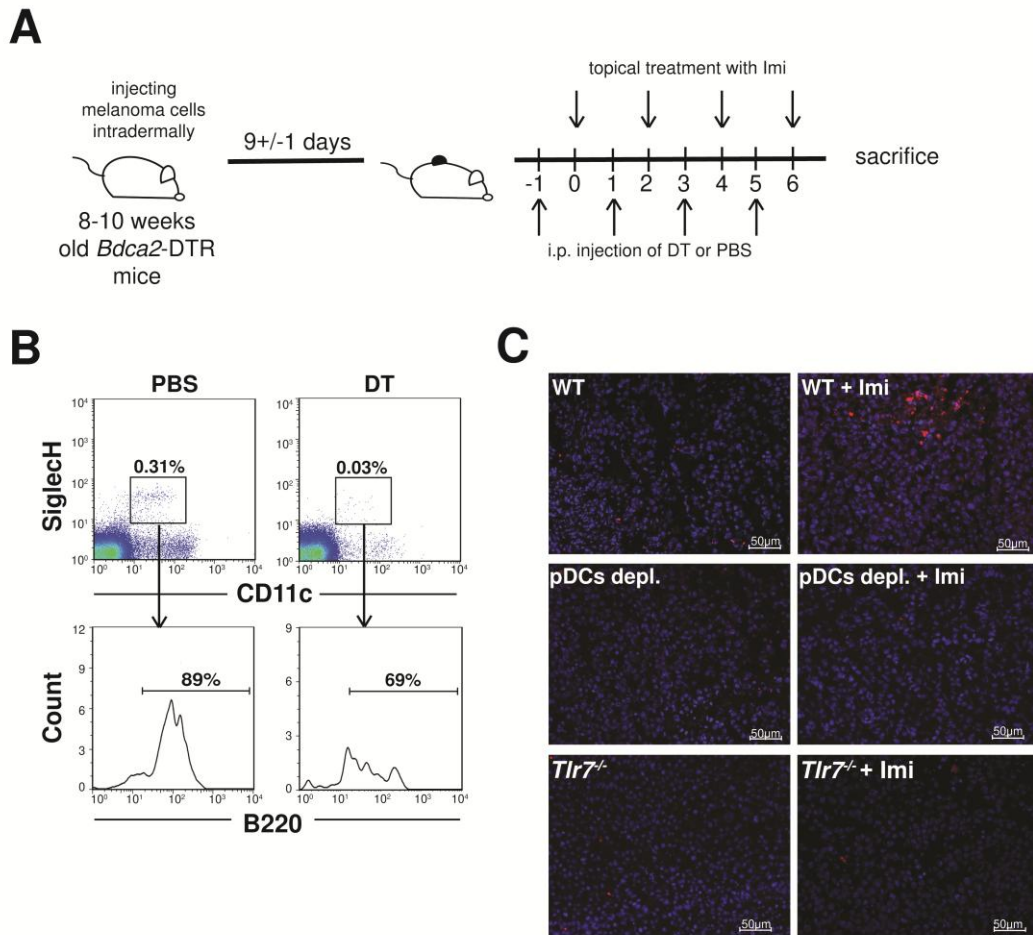

**Supplemental Figure 4 pDCs are the effector cells in mediating the tumoricidal effect of Imiquimod**

**(A)** Experimental protocol for pDC depletion: Diptheria Doxin (DT) (4.5 ng per g body weight) or PBS (control) was administered intraperitoneally (i.p) in tumor bearing *Bdca2*-DTR<sup>+</sup> mice every other day. First Imi treatment was performed one day after depletion start. **(B)** FACS analysis showing pDC (CD11c<sup>+</sup>B220<sup>+</sup>SigleCH<sup>+</sup>) depletion efficacy in tumor-bearing *Bdca2*-DTR mice treated with DT. **(C)** Representative immune-fluorescence staining of active caspase-3 in tumor tissue of WT (n = 7-8 per group), *Bdca2*-DTR + DT (pDCs depl.) (n = 8-9 per group) and *Tlr7*<sup>-/-</sup> mice (n = 3 per group) treated with Imi or left untreated. Magnification x200

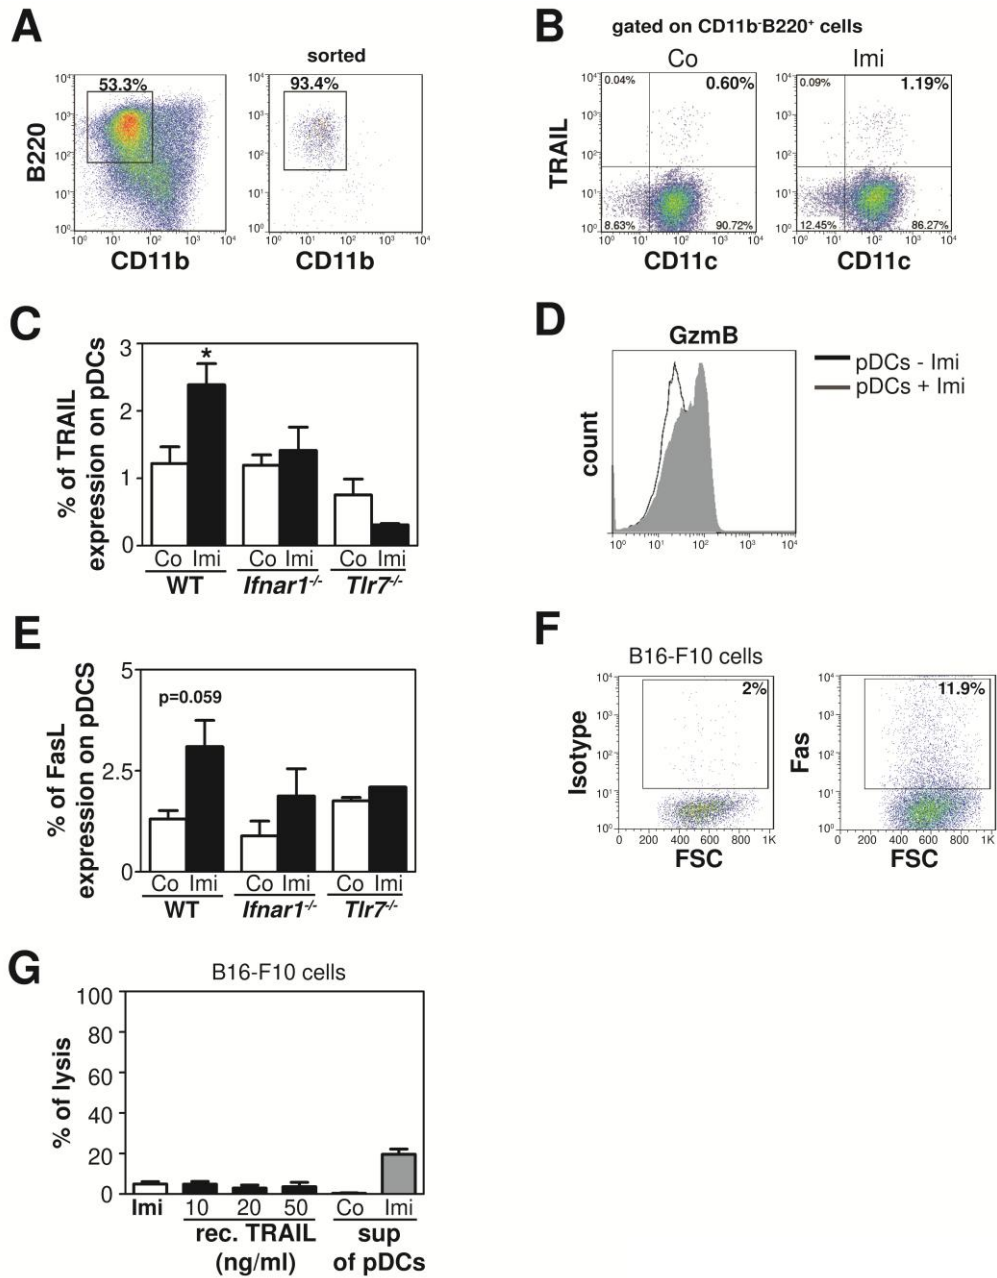

### Supplemental Figure 5 Imiquimod stimulated pDCs kill tumor cells

**(A)** FACS sorted B220<sup>+</sup>CD11b<sup>-</sup> cells of in vitro generated BM-derived pDCs. **(B)** Representative dot plots of TRAIL expression on WT pDCs (CD11b<sup>-</sup>B220<sup>+</sup>) after 6 hours of Imi (2.5  $\mu$ g/ml) stimulation. **(C)** Quantification of TRAIL expression by FACS on WT, *Ifnar1*<sup>-/-</sup> and *Tlr7*<sup>-/-</sup> pDCs after 6 hours of Imi stimulation. **(D)** Flow cytometric analysis showing intracellular granzyme B (GzmB) staining of pDCs after stimulation with Imi for 4 hours. **(E)** Quantification of FasL expression on WT, *Ifnar1*<sup>-/-</sup> and *Tlr7*<sup>-/-</sup> pDCs after Imi stimulation for 6 hours analyzed by FACS. **(F)** Representative staining of Isotype (IgG) or Fas antibodies on B16-F10 melanoma cells. **(G)** Killing assay performed with B16-F10 melanoma treated with Imi, recombinant TRAIL (10, 20, 50 ng/ml) or supernatants of Imi stimulated or unstimulated WT pDCs. Graphs are representative for one experiment of at least 2 independent batches.\*  $P < 0.05$

## Supplemental Table 1

| <b>Primer Sequences for RT-PCR</b>                                                     |
|----------------------------------------------------------------------------------------|
| <b><i>Tlr1</i></b> : 5'-CAATGTGGAACAACGTGGA-3'; 5'-TGTAAC TTTGGGGGAAGCTG-3';           |
| <b><i>Tlr2</i></b> : 5'-AAGAGGAAGCCCAAGAAAGC-3'; 5'-CGATGGAATCGATGATGTTG -3';          |
| <b><i>Tlr3</i></b> : 5'-CACAGGCTGAGCAGTTTGAA-3'; 5'-TTTCGGCTTCTTTTGATGCT-3';           |
| <b><i>Tlr4</i></b> : 5'-ACCTGGCTGGTTTACACGTC- 3'; 5'-CTGCCAGAGACATTGCAGAA- 3';         |
| <b><i>Tlr5</i></b> : 5'-AAGTTCCGGGAATCTGTTT-3'; 5'-GCATAGCCTGAGCCTGTTTC-3';            |
| <b><i>Tlr6</i></b> : 5'-TTCCAATACCACCGTTCTC- 3'; 5'-CTATGTGCTGGAGGGTCACA-3';           |
| <b><i>Tlr7</i></b> : 5'-AATCCACAGGCTCACCCATA-3'; 5'-CAGGTACCAAGGGATGTCCT-3';           |
| <b><i>Tlr8</i></b> : 5'-GTTATGTTGGCTGCTCTGGTTCAC-3'; 5'- TCACTCTTCAAGGTGGTAGC- 3';     |
| <b><i>Tlr9</i></b> : 5'-ACTGAGCACCCCTGCTTCTA-3'; 5'-AGATTAGTCAGCGGCAGGAA- 3';          |
| <b><i>Tlr11</i></b> : 5'-TTGATGTATTCGTGTCCCACTGC-3'; 5'-CCACTCTTCTCTCCTCTTCCTCG-3';    |
| <b><i>Gapdh</i></b> : 5'-CTCATGACCACAGTCCATCG-3'; 5'-CACATTGGGGGTAGGAACAC-3'           |
| <b>Primer Sequences for qRT-PCR</b>                                                    |
| <b><i>Trail</i></b> : 5'-GTGTCTGTGGCTGTGACTTACA-3'; 5'-AATGCCCTTTCCGAGAGGA-3';         |
| <b><i>Gzmb</i></b> : 5'-ATTCCCCACCCAGACTATAATCC-3'; 5'-TTACTCTTCAGCTTTAGCAGCATGA-3';   |
| <b><i>Actin</i></b> : 5'-ACCAACTGGGACGATATGGAGAAGA-3'; 5'TACGACCAGAGGCATACAGGGACAA-3'; |
